# Supplementary material for: An oncolytic vaccinia virus encoding hyaluronidase reshapes the extracellular matrix to enhance cancer chemotherapy and immunotherapy
Source: HighWire-hosted journal article supplement (doi:10.1136/jitc-2023-008431), 2024-03-01
Supplement: jitc-2023-008431supp001_data_supplement.pdf [file jitc-2023-008431supp001_data_supplement.pdf]

## An oncolytic vaccinia virus encoding hyaluronidase reshapes the extracellular matrix to enhance cancer chemo- and immunotherapy

### Graphical Abstract

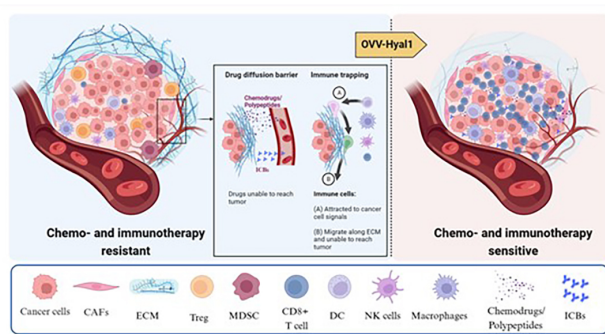

### Highlights

- OVV-Hyal1 reshapes the ECM of solid tumors via HA degradation.
- OVV-Hyal1 facilitates virus spread, chemodrug dissemination, and immune cells infiltration within TME.
- OVV-Hyal1 significantly improves the antitumor outcomes of doxorubicin, gemcitabine, polypeptide GLP1, CAR-T cells and ICBs such as PD-1 and CD47 antibodies in a serial of solid tumors.

### Authors

Shibing Wang, Yuxin Li, Chuning Xu,  
Jie Dong, Jiwu Wei

### Correspondence

wjw@nju.edu.cn (J.W.)

### In Brief

The redundant ECM within solid TME often limits intratumoral diffusion of antitumor drugs, or hinders infiltration of immune cells, which results in poor antitumor efficacy of chemo- and immunotherapy. Wang et al. engineered a novel recombinant oncolytic vaccinia virus encoding the hyaluronidase (OVV-Hyal1) to reshape the ECM by degrading hyaluronic acid, a major component of ECM of many solid tumors, therefore, circumvented some major hurdles in current cancer therapy.
